# Supplementary material for: A new fluorescent chemosensor for fluoride anion based on a pyrrole–isoxazole derivative
Source: PubMed Central journal article supplement (PMC3028564; doi:10.3762/bjoc.7.8), 2011-01-12
Supplement: Beilstein_J_Org_Chem-07-46-s001.pdf [file Beilstein_J_Org_Chem-07-46-s001.pdf]

Supporting Information  
for  
**A new fluorescent chemosensor for fluoride  
anion based on a pyrrole–isoxazole derivative**

Zhipei Yang<sup>1</sup>, Kai Zhang<sup>1</sup>, Fangbin Gong<sup>1</sup>, Shayu Li<sup>1</sup>, Jun Chen<sup>1</sup>, Jin Shi Ma<sup>1</sup>,  
Lyubov N. Sobenina<sup>2</sup>, Albina I. Mikhaleva<sup>2</sup>, Guoqiang Yang<sup>\*,1</sup> and Boris A.  
Trofimov<sup>\*,2</sup>

Address: <sup>1</sup>Beijing National Laboratory for Molecular Sciences, CAS Key Laboratory of  
Photochemistry, Institute of Chemistry, Chinese Academy of Sciences, Beijing, 100190,  
China and <sup>2</sup>A. E. Favorsky Irkutsk Institute of Chemistry, Siberian Branch of the Russian  
Academy of Sciences, 1 Favorsky Str., Irkutsk, 664033, Russian Federation

Email: Guoqiang Yang - gqyang@iccas.ac.cn; Boris Trofimov -  
boris\_trofimov@irioch.irk.ru

**Crystal Data and Structure Refinement Information for Receptor 1**

Table S1: Crystal and structure refinement data for receptor 1

| Receptor                | <b>1</b>                                                                    |
|-------------------------|-----------------------------------------------------------------------------|
| empirical formula       | C <sub>14</sub> H <sub>14</sub> N <sub>4</sub> O <sub>2</sub>               |
| F <sub>w</sub>          | 246.27                                                                      |
| crystallizing solvent   | CH <sub>3</sub> CN                                                          |
| unit cell               | Monoclinic                                                                  |
| space group             | P2(1)/c                                                                     |
| T(K)                    | 113(2)                                                                      |
| dimensions              |                                                                             |
| a [Å]                   | 13.341(3)                                                                   |
| b [Å]                   | 6.5946(13)                                                                  |
| c [Å]                   | 12.590(3)                                                                   |
| angles                  |                                                                             |
| α [°]                   | 90                                                                          |
| β [°]                   | 93.03(3)                                                                    |
| γ [°]                   | 90                                                                          |
| V [Å <sup>3</sup> ]     | 1106.0(4)                                                                   |
| Z                       | 4                                                                           |
| F(000)                  | 520                                                                         |
| ρ [g cm <sup>-3</sup> ] | 1.479                                                                       |
| μ(mm <sup>-1</sup> )    | 0.105                                                                       |
| Reflections collected   | 8100                                                                        |
| Unique reflections      | 2634                                                                        |
| R <sub>int</sub>        | 0.0415                                                                      |
| Final R indices [I>2σI] | R <sub>1</sub> <sup>a</sup> = 0.0447, wR <sub>2</sub> <sup>b</sup> = 0.1149 |
| R indices (all data)    | R <sub>1</sub> = 0.0572, wR <sub>2</sub> = 0.1327                           |
| GOF                     | 1.130                                                                       |

[a]  $R_1 = \sum ||F_0| - |Fc|| / \sum |F_0|$ , [b]  $wR_2 = [\sum w(F_0^2 - Fc^2)^2 / \sum w(F_0^2)^2]^{1/2}$ .
